# Supplementary material
Source: publisher figshare collection journal article supplement (https://sage.figshare.com/ndownloader/files/19965620)
Supplement: Supplementary file 1 [file 19965620]

EMPIRICAL INSIGHTS FOR IMPROVING SEXUAL ASSAULT PREVENTION:

EVIDENCE FROM BASELINE DATA FOR A CLUSTER-RANDOMIZED TRIAL OF IMPOWER AND SOURCES OF STRENGTH

SUPPLEMENTARY MATERIALS

Table 1

Comparison of average predicted rape probability by subgroup, using results from the adjudication model

| Group | Number of Girls | Average Predicted Probability of Rape |
| --- | --- | --- |
| Girls reporting rape in the past year, with consistent responses | 228 | 19.9% |
| Girls reporting rape in the past year, with inconsistent responses | 70 | 17.0% |
| Girls not reporting rape in the past year | 3,827 | 5.5% |

Table 2

Covariate balance from the near-far matching algorithm, when exploring intimate partner violence as a candidate causal pathway

| Quantity | Higher value (n = 1923) | Lower value  (n = 1923) | Standardized Difference |
| --- | --- | --- | --- |
| Intimate partner violence | 0.101 | 0.001 | 0.468 |
| Parental violence: missing indicator | 0.312 | 0.208 | 0.020 |
| Parental violence | 0.179 | 0.176 | 0.008 |
| Socioeconomic status: missing indicator | 0.104 | 0.104 | 0.000 |
| Socioeconomic status | 2.864 | 2.884 | 0.014 |
| Mother dead: missing indicator | 0.520 | 0.364 | 0.024 |
| Mother dead | 0.034 | 0.034 | 0.002 |
| Father dead: missing indicator | 4.368 | 4.368 | 0.000 |
| Father dead | 0.086 | 0.086 | 0.000 |
| Has boyfriend: missing indicator | 1.820 | 1.820 | 0.000 |
| Has boyfriend | 0.209 | 0.208 | 0.003 |
| Taught a no-means-no skill:  missing indicator | 2.548 | 2.444 | 0.007 |
| Taught a no-means-no skill | 0.171 | 0.170 | 0.001 |
| Times consumed alcohol: missing indicator | 0.832 | 0.832 | 0.000 |
| Times consumed alcohol | 0.103 | 0.103 | 0.001 |
| Self efficacy: missing indicator | 1.664 | 1.560 | 0.008 |
| Self efficacy | 3.836 | 3.849 | 0.021 |
| Gender normative thinking: missing indicator | 1.664 | 1.560 | 0.008 |
| Gender normative thinking | 2.435 | 2.451 | 0.048 |

Table 3

Covariate balance from the near-far matching algorithm, when exploring self efficacy as a candidate causal pathway

| Quantity | Higher value (n = 1918) | Lower value  (n = 1918) | Standardized Difference |
| --- | --- | --- | --- |
| Self efficacy | 4.354 | 3.318 | 2.610 |
| Parental violence: missing indicator | 0.521 | 0.417 | 0.015 |
| Parental violence | 0.172 | 0.179 | 0.017 |
| Socioeconomic status: missing indicator | 0.209 | 0.261 | 0.011 |
| Socioeconomic status | 2.879 | 2.861 | 0.012 |
| Mother dead: missing indicator | 0.730 | 0.678 | 0.006 |
| Mother dead | 0.040 | 0.038 | 0.011 |
| Father dead: missing indicator | 4.692 | 4.901 | 0.010 |
| Father dead | 0.090 | 0.088 | 0.005 |
| Has boyfriend: missing indicator | 1.981 | 2.086 | 0.007 |
| Has boyfriend | 0.202 | 0.203 | 0.001 |
| Taught a no-means-no skill:  missing indicator | 2.450 | 2.815 | 0.023 |
| Taught a no-means-no skill | 0.178 | 0.176 | 0.007 |
| Times consumed alcohol: missing indicator | 1.199 | 1.199 | 0.000 |
| Times consumed alcohol | 0.106 | 0.108 | 0.006 |
| Intimate partner violence: missing indicator | 1.460 | 1.564 | 0.009 |
| Intimate partner violence | 0.040 | 0.047 | 0.033 |
| Gender normative thinking: missing indicator | 0.000 | 0.000 | 0.000 |
| Gender normative thinking | 2.439 | 2.446 | 0.020 |

Table 4

Covariate balance from the near-far matching algorithm, when exploring alcohol use as a candidate causal pathway

| Quantity | Higher value (n = 1927) | Lower value  (n = 1927) | Standardized Difference |
| --- | --- | --- | --- |
| Times consumed alcohol | 0.241 | 0.000 | 0.667 |
| Parental violence: missing indicator | 0.259 | 0.259 | 0.000 |
| Parental violence | 0.174 | 0.175 | 0.003 |
| Socioeconomic status: missing indicator | 0.156 | 0.156 | 0.000 |
| Socioeconomic status | 2.877 | 2.871 | 0.005 |
| Mother dead: missing indicator | 0.363 | 0.311 | 0.009 |
| Mother dead | 0.034 | 0.033 | 0.006 |
| Father dead: missing indicator | 4.203 | 4.203 | 0.000 |
| Father dead | 0.085 | 0.085 | 0.000 |
| Has boyfriend: missing indicator | 1.868 | 1.868 | 0.000 |
| Has boyfriend | 0.206 | 0.204 | 0.004 |
| Taught a no-means-no skill:  missing indicator | 2.491 | 2.387 | 0.007 |
| Taught a no-means-no skill | 0.171 | 0.171 | 0.001 |
| Self efficacy: missing indicator | 1.713 | 1.609 | 0.008 |
| Self efficacy | 3.839 | 3.844 | 0.008 |
| Intimate partner violence: missing indicator | 1.194 | 1.038 | 0.015 |
| Intimate partner violence | 0.046 | 0.042 | 0.022 |
| Gender normative thinking: missing indicator | 1.713 | 1.609 | 0.008 |
| Gender normative thinking | 2.428 | 2.459 | 0.097 |

Table 5

Covariate balance from the near-far matching algorithm, when exploring gender normative thinking as a candidate causal pathway

| Quantity | Higher value (n = 1918) | Lower value  (n = 1918) | Standardized Difference |
| --- | --- | --- | --- |
| Gender normative thinking | 2.689 | 2.194 | 2.272 |
| Parental violence: missing indicator | 0.365 | 0.313 | 0.009 |
| Parental violence | 0.171 | 0.181 | 0.025 |
| Socioeconomic status: missing indicator | 0.261 | 0.156 | 0.023 |
| Socioeconomic status | 2.852 | 2.891 | 0.027 |
| Mother dead: missing indicator | 0.574 | 0.574 | 0.000 |
| Mother dead | 0.034 | 0.034 | 0.000 |
| Father dead: missing indicator | 4.588 | 4.588 | 0.000 |
| Father dead | 0.085 | 0.086 | 0.002 |
| Has boyfriend: missing indicator | 2.033 | 1.929 | 0.007 |
| Has boyfriend | 0.199 | 0.201 | 0.003 |
| Taught a no-means-no skill:  missing indicator | 2.503 | 2.503 | 0.000 |
| Taught a no-means-no skill | 0.172 | 0.170 | 0.006 |
| Times consumed alcohol: missing indicator | 1.095 | 1.095 | 0.000 |
| Times consumed alcohol | 0.098 | 0.102 | 0.014 |
| Self efficacy: missing indicator | 0.000 | 0.000 | 0.000 |
| Self efficacy | 3.842 | 3.851 | 0.014 |
| Intimate partner violence: missing indicator | 1.199 | 1.147 | 0.005 |
| Intimate partner violence | 0.043 | 0.038 | 0.025 |

Table 6

Summary statistics for each of the numeric school-level covariates

| Variable | Mean | Standard Deviation | Range |
| --- | --- | --- | --- |
| Mean Test Score | 263.89 | 35.45 | (189.55, 378.58) |
| Girls’ Toilets | 9.16 | 4.83 | (1, 20) |
| Boys’ Toilets | 10.92 | 5.83 | (1, 25) |
| Total Students | 563.92 | 365.21 | (117, 1772) |
| Total Teachers | 15.83 | 9.39 | (4, 66) |
| Total Classrooms | 10.24 | 4.37 | (4, 21) |
| Students Per Classroom | 53.08 | 20.01 | (17.62, 126.57) |
| Students Per Teacher | 44.31 | 31.67 | (4.88, 188) |
| Gender Ratio | 0.96 | 0.14 | (0.62, 1.52) |
| Relative Dropout Rate | 1.13 | 0.44 | (0.48, 3.25) |
| Girls’ Toilets Per Girl | 0.05 | 0.03 | (0.01, 0.13) |
| Boys’ Toilets Per Boy | 0.04 | 0.02 | (0.01, 0.16) |
